# Supplementary material for: CircZBTB46 Protects Acute Myeloid Leukemia Cells from Ferroptotic Cell Death by Upregulating SCD
Source: MDPI journal article supplement (doi:10.3390/cancers15020459), 2023-01-11
Supplement: s1 [file s1]

# Supplementary Material: *CircZBTB46* Protects Acute Myeloid Leukemia cells from ferroptotic cell death by upregulating SCD

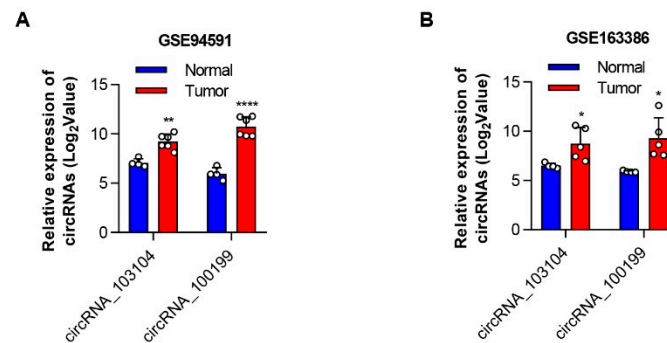

**Figure S1.** Relative expression of the two overlapping circRNAs in microarray datasets. **(A)** Relative expression of *hsa\_circRNA\_103104* and *hsa\_circRNA\_100199* in GSE94591 microarray datasets. **(B)** Relative expression of *hsa\_circRNA\_103104* and *hsa\_circRNA\_100199* in GSE163386 microarray datasets. The data are shown as the mean  $\pm$  SD. The *P* values were determined by a two-tailed unpaired Student's *t* test; \**P*<0.05, \*\**P*<0.01, \*\*\*\**P*<0.0001. Related to Figure 1.

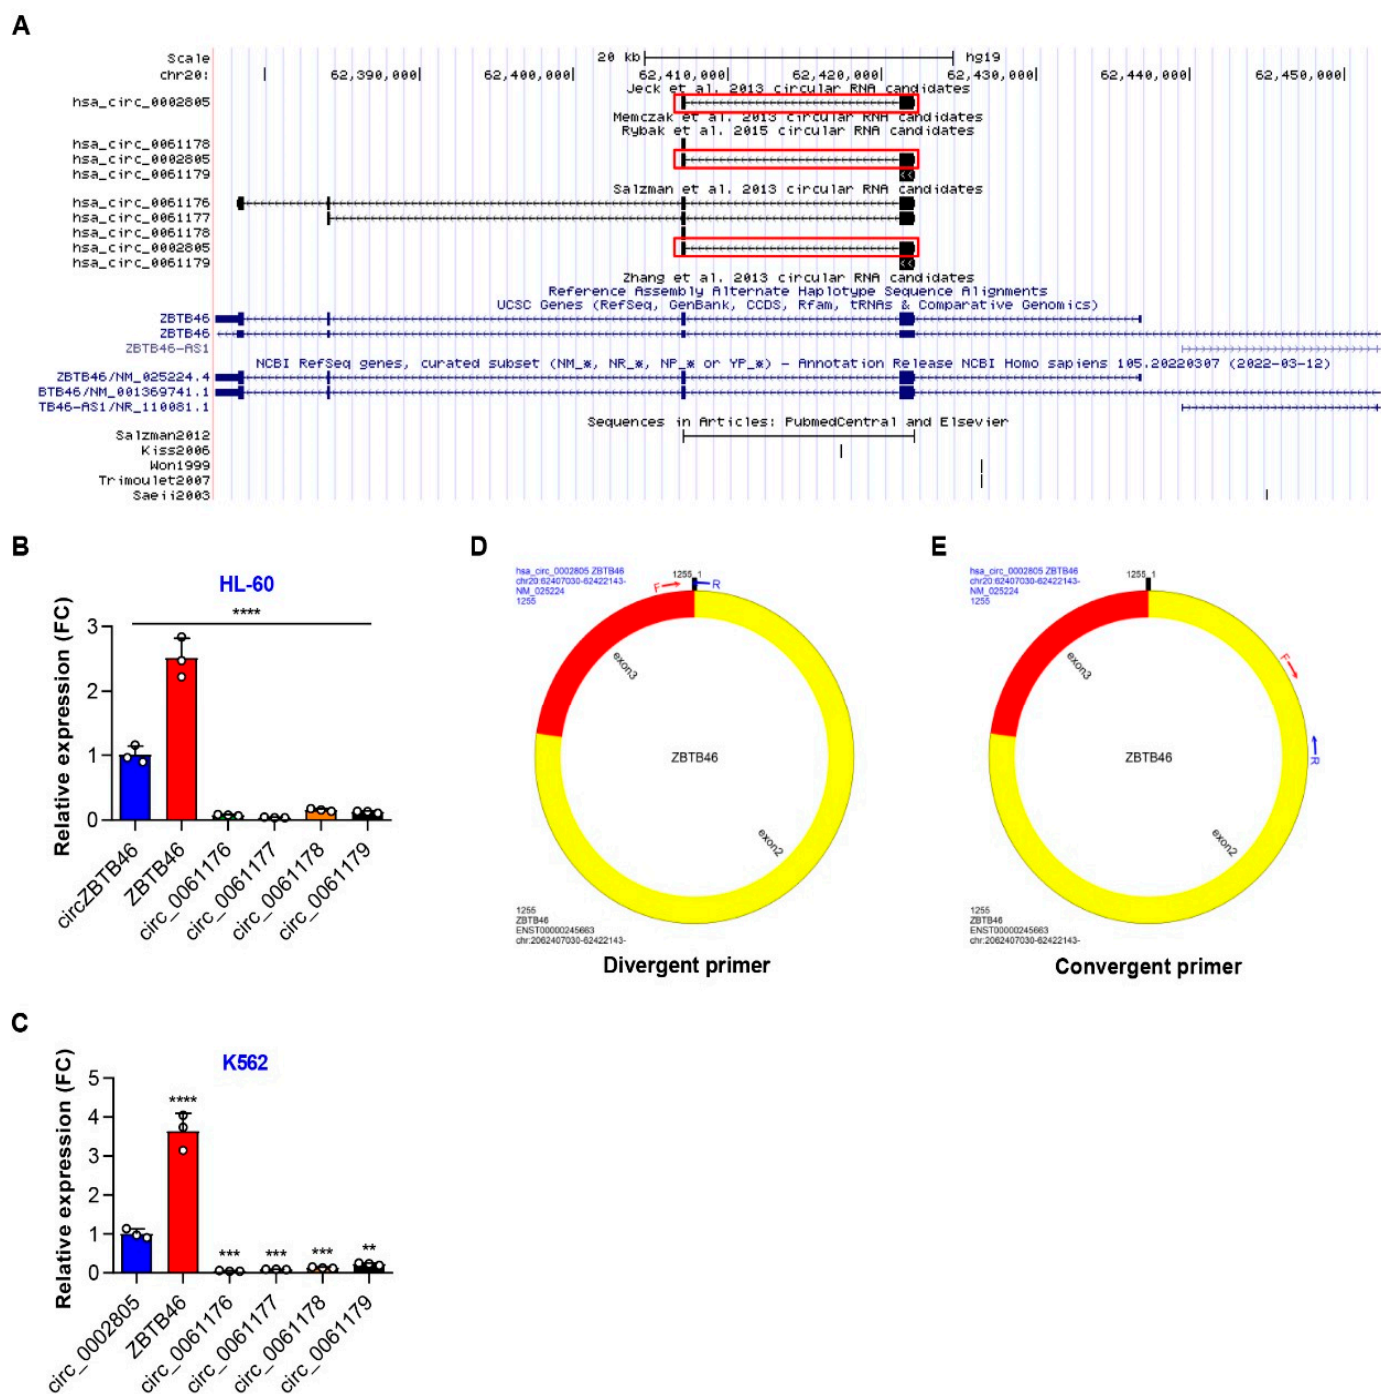

**Figure S2. Verification of the existence and circularization of *circZBTB46*.** (A) Schematic representation of the chromosome location of *circZBTB46* using the UCSC Genome Browser. (B, C) qRT-PCR showing the expression abundance of *circZBTB46*, *ZBTB46* mRNA and other homologous circRNAs in AML cell lines. (D, E) Schematic representation of the design of divergent and convergent primers for *circZBTB46* using circPrimer software. The data are shown as the mean  $\pm$  SD. The *P* values were determined by one-way ANOVA (B and C); \*\**P*<0.01, \*\*\**P*<0.001, \*\*\*\**P*<0.0001. Related to Figure 2.

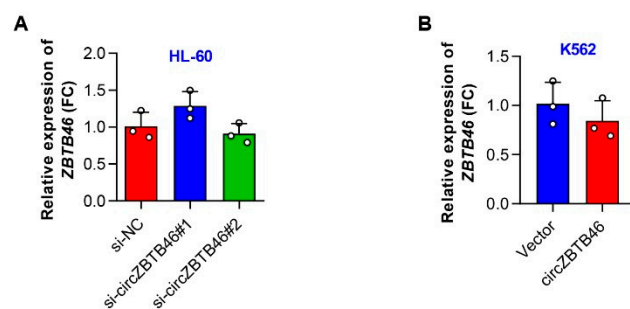

**Figure S3. The expression of ZBTB46 mRNA in AML cells with *circZBTB46* knockdown or over-expression.** (A) qRT-PCR showing the expression of ZBTB46 mRNA in HL-60 cells under control conditions (*sh-NC*) or upon *circZBTB46* knockdown (*sh-circZBTB46*). (B) qRT-PCR showing the expression of ZBTB46 mRNA in K562 cells after the transfection of control vector or *circZBTB46* vector. The data are shown as the mean  $\pm$  SD. The *P* values were determined by a two-tailed unpaired Student's *t* test (B), or one-way ANOVA (A); Related to Figure 3.

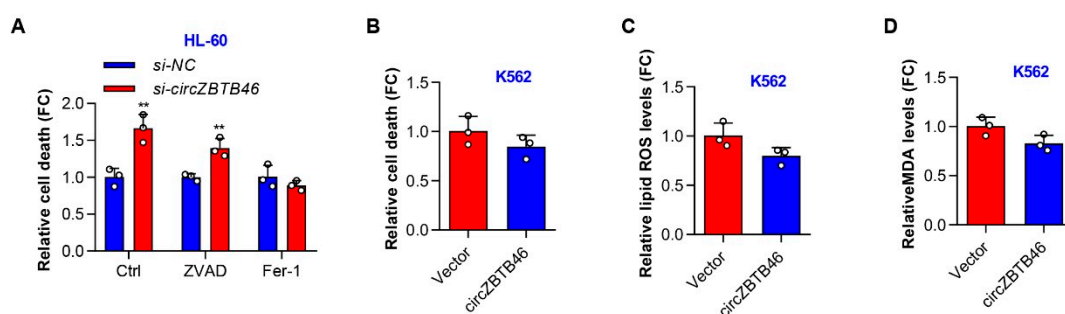

**Figure S4. The effect of *circZBTB46* knockdown or overexpression on ferroptosis of AML cells.** (A) Relative cell death of control and *circZBTB46*-knockdown cells in the absence or presence of ZVAD or ferrostatin-1. (B) Relative cell death of K562 cells after the transfection of the control vector or *circZBTB46* overexpression vector. (C) Relative lipid ROS levels of K562 cells after the transfection of the control vector or *circZBTB46* overexpression vector. ROS, reactive oxygen species. (D) Relative MDA levels of K562 cells after the transfection of the control vector or *circZBTB46* overexpression vector. MAD, malondialdehyde. The data are shown as the mean  $\pm$  SD. The *P* values were determined by a two-tailed unpaired Student's *t* test; Related to Figure 4.

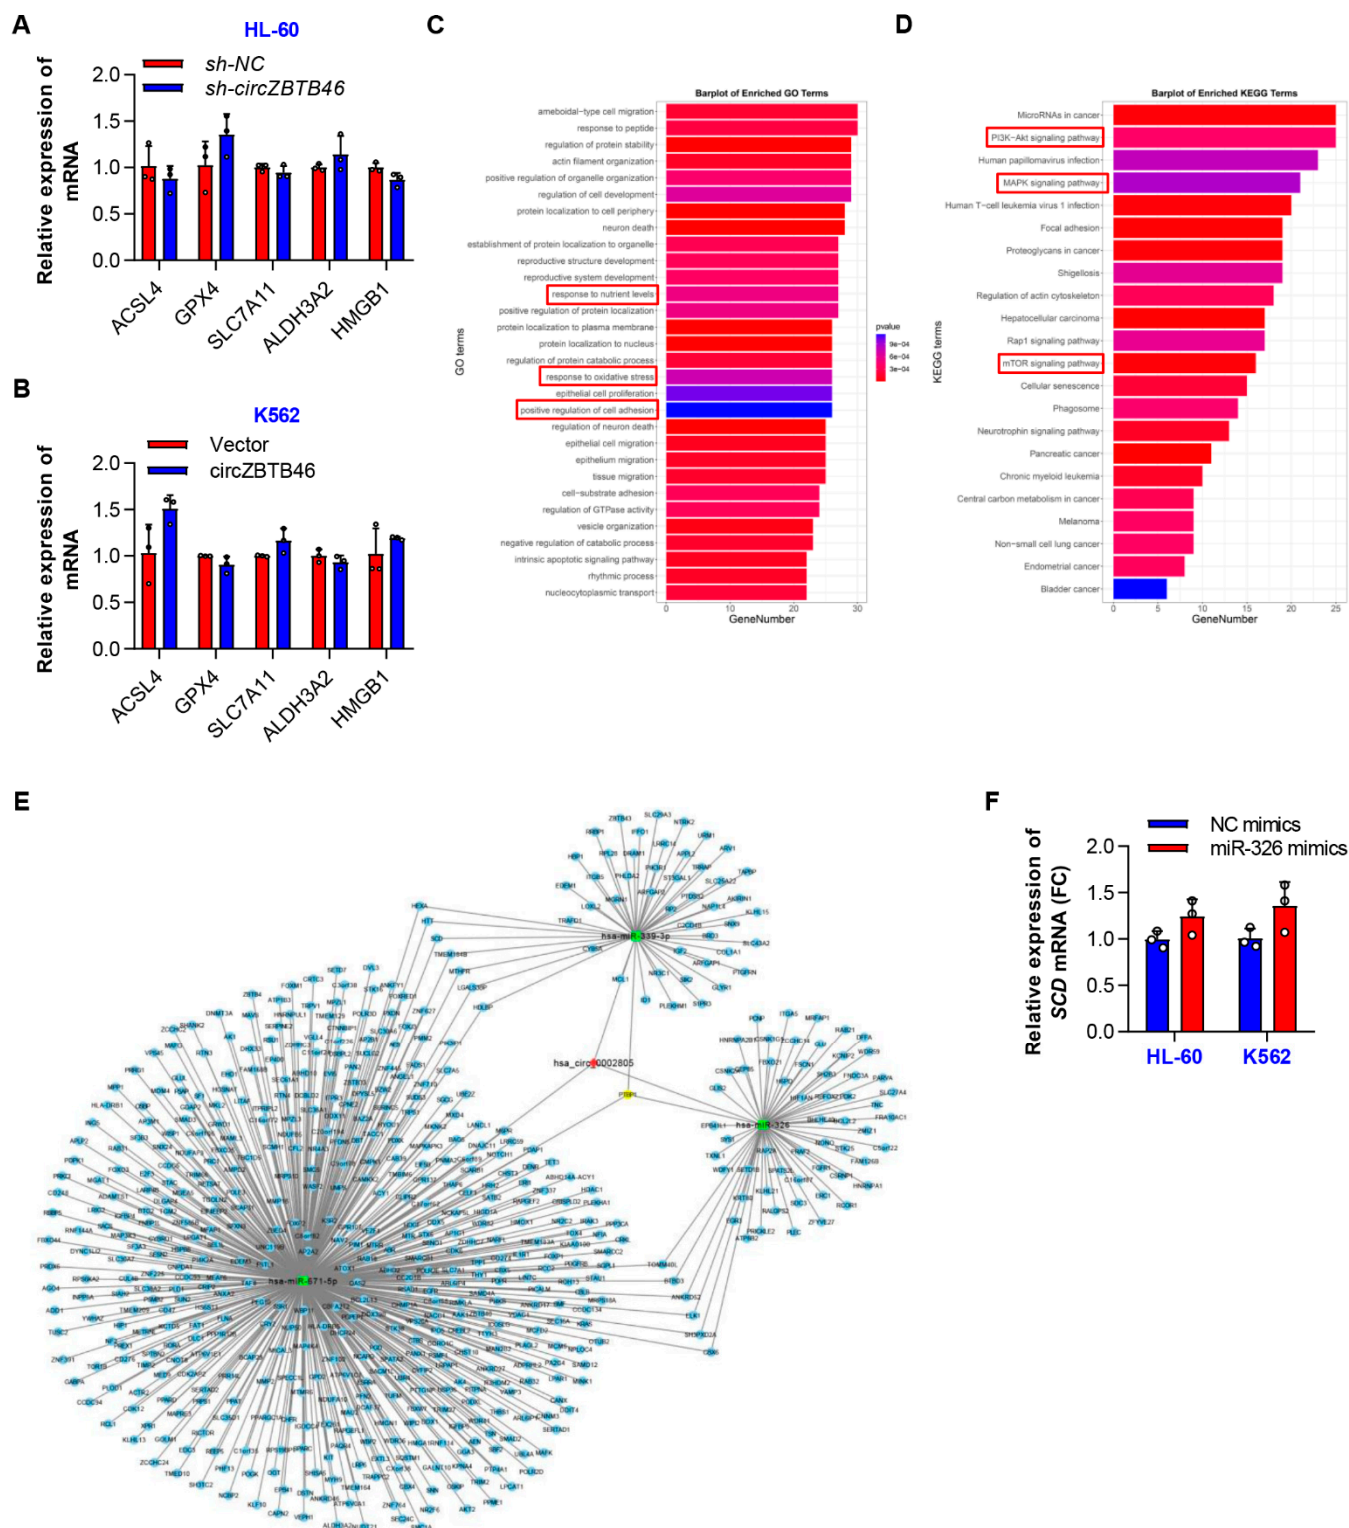

**Figure S5. The expression of ferroptosis-related genes in AML cells with *circZBTB46* knockdown or overexpression.** (A) qRT-PCR showing the expression of ferroptosis-related genes in HL-60 cells under control conditions (*sh-NC*) or upon *circZBTB46* knockdown (*sh-circZBTB46*). (B) qRT-PCR showing the expression of ferroptosis-related genes in K562 cells after the transfection of control vector or *circZBTB46* vector. (C) GO analysis annotates the biological process and clusters the modules of target genes. (D) KEGG analysis annotates the signaling pathway of target genes. (E) The crosstalk network of circRNA-miRNA-mRNA about *circZBTB46* (*hsa\_circ\_0002805*). (F) qRT-PCR showing the expression of *SCD* mRNA in AML cells after the transfection of NC mimics or miR-326 mimics. Related to Figure 5.

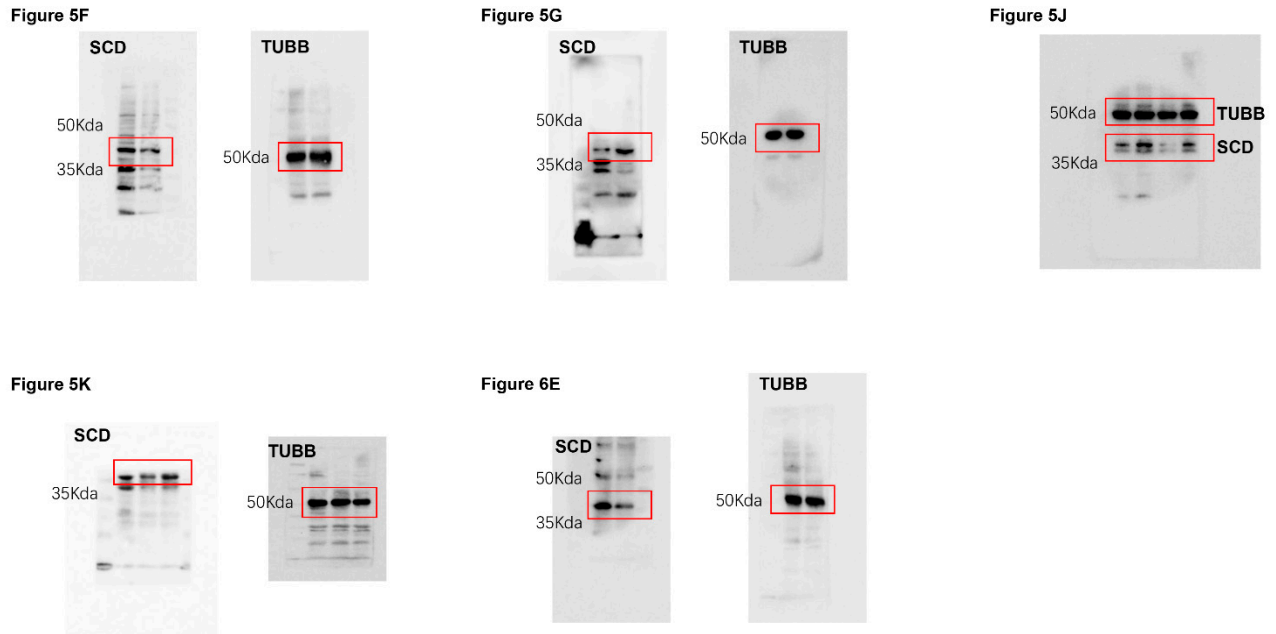

**Figure S6.** Uncropped Western blot images of Figure 5F-G, 5J-K, and 6E.

**Table S1.** The 13 and 68 significantly upregulated circRNAs screened from the two microarray datasets.

| GSE94591           |          |          |          |          |           |          |
|--------------------|----------|----------|----------|----------|-----------|----------|
| CircRNA ID         | logFC    | AveExpr  | t        | P.Value  | adj.P.Val | B        |
| hsa_circRNA_104336 | 2.085969 | 10.16515 | 4.645568 | 0.000716 | 0.00753   | -0.46767 |
| hsa_circRNA_001899 | 2.100628 | 7.765114 | 6.167206 | 7.14E-05 | 0.001649  | 1.883467 |
| hsa_circRNA_104640 | 2.102201 | 14.02793 | 4.571876 | 0.000808 | 0.008012  | -0.58982 |
| hsa_circRNA_101287 | 2.142733 | 13.63376 | 3.627365 | 0.003996 | 0.023307  | -2.2094  |
| hsa_circRNA_103105 | 2.143185 | 7.316859 | 6.133585 | 7.48E-05 | 0.001672  | 1.835166 |
| hsa_circRNA_103104 | 2.15949  | 8.362495 | 5.714889 | 0.000137 | 0.002524  | 1.219796 |
| hsa_circRNA_102806 | 2.28082  | 8.525003 | 3.272134 | 0.007468 | 0.034692  | -2.83573 |
| hsa_circRNA_100033 | 2.477148 | 11.86404 | 4.481456 | 0.000937 | 0.00879   | -0.74066 |
| hsa_circRNA_101142 | 2.491151 | 12.22139 | 4.858889 | 0.000508 | 0.006086  | -0.11812 |
| hsa_circRNA_104181 | 2.79361  | 9.358879 | 4.274185 | 0.001321 | 0.011127  | -1.09021 |
| hsa_circRNA_102913 | 3.408693 | 11.15385 | 3.848818 | 0.002721 | 0.018009  | -1.82216 |
| hsa_circRNA_104700 | 3.680317 | 11.76521 | 6.884544 | 2.69E-05 | 0.000859  | 2.875286 |
| hsa_circRNA_100199 | 4.779854 | 8.83435  | 9.801448 | 9.27E-07 | 0.000161  | 6.229259 |
| GSE163386          |          |          |          |          |           |          |
| CircRNA ID         | logFC    | AveExpr  | t        | P.Value  | adj.P.Val | B        |
| hsa_circRNA_101463 | 2.047413 | 7.794814 | 6.053828 | 0.000221 | 0.005869  | 0.698072 |
| hsa_circRNA_101113 | 2.057848 | 7.321678 | 2.825025 | 0.020614 | 0.06961   | -4.05447 |
| hsa_circRNA_104821 | 2.072789 | 8.38212  | 3.885537 | 0.003973 | 0.026379  | -2.35603 |
| hsa_circRNA_103433 | 2.078558 | 7.383744 | 2.451518 | 0.037625 | 0.099281  | -4.65741 |
| hsa_circRNA_102315 | 2.108835 | 7.769759 | 3.71446  | 0.005136 | 0.030787  | -2.624   |
| hsa_circRNA_001059 | 2.123086 | 10.93351 | 3.747145 | 0.004888 | 0.029769  | -2.57255 |
| hsa_circRNA_102901 | 2.124669 | 7.389081 | 4.506969 | 0.001619 | 0.016692  | -1.41299 |
| hsa_circRNA_104948 | 2.128567 | 7.935827 | 4.506407 | 0.001621 | 0.016692  | -1.41382 |
| hsa_circRNA_104833 | 2.142165 | 9.151013 | 5.665561 | 0.000353 | 0.007672  | 0.200433 |
| hsa_circRNA_103312 | 2.147661 | 7.803034 | 3.587518 | 0.006228 | 0.034526  | -2.82483 |
| hsa_circRNA_100010 | 2.174446 | 8.199833 | 3.439418 | 0.007821 | 0.039549  | -3.06102 |
| hsa_circRNA_104792 | 2.194531 | 8.039298 | 6.167558 | 0.000193 | 0.005516  | 0.839878 |
| hsa_circRNA_101172 | 2.204741 | 7.538335 | 4.499624 | 0.001636 | 0.016698  | -1.42383 |
| hsa_circRNA_001622 | 2.212779 | 7.618225 | 3.11559  | 0.012977 | 0.053503  | -3.58293 |
| hsa_circRNA_101488 | 2.214877 | 7.421224 | 8.598035 | 1.57E-05 | 0.001438  | 3.487348 |
| hsa_circRNA_103104 | 2.235255 | 7.743211 | 2.936719 | 0.017241 | 0.062843  | -3.87312 |
| hsa_circRNA_103176 | 2.236382 | 8.320926 | 3.482617 | 0.007316 | 0.037941  | -2.99193 |
| hsa_circRNA_100003 | 2.238126 | 7.664472 | 4.078659 | 0.002988 | 0.02265   | -2.05762 |
| hsa_circRNA_101314 | 2.239374 | 8.064184 | 5.683499 | 0.000345 | 0.007614  | 0.223891 |
| hsa_circRNA_100583 | 2.2626   | 7.59768  | 3.790368 | 0.004581 | 0.028726  | -2.5047  |
| hsa_circRNA_103695 | 2.294603 | 8.463686 | 3.963396 | 0.00354  | 0.024392  | -2.23518 |

|                    |          |          |          |          |          |          |
|--------------------|----------|----------|----------|----------|----------|----------|
| hsa_circRNA_103514 | 2.29468  | 8.261188 | 4.215355 | 0.002451 | 0.020182 | -1.84922 |
| hsa_circRNA_101555 | 2.311228 | 12.09465 | 4.070237 | 0.003025 | 0.022749 | -2.07054 |
| hsa_circRNA_100245 | 2.355684 | 7.765309 | 16.2735  | 8.47E-08 | 3.66E-05 | 8.736009 |
| hsa_circRNA_002172 | 2.359638 | 13.22357 | 2.364296 | 0.043315 | 0.108886 | -4.79646 |
| hsa_circRNA_101033 | 2.370043 | 7.730358 | 3.608641 | 0.006031 | 0.033864 | -2.7913  |
| hsa_circRNA_104479 | 2.37709  | 7.948591 | 3.960122 | 0.003557 | 0.024462 | -2.24025 |
| hsa_circRNA_100016 | 2.396914 | 8.884754 | 3.447525 | 0.007723 | 0.039228 | -3.04804 |
| hsa_circRNA_103435 | 2.415665 | 8.445025 | 3.641702 | 0.005735 | 0.03306  | -2.73891 |
| hsa_circRNA_103619 | 2.419435 | 9.628518 | 2.971309 | 0.016316 | 0.060607 | -3.81696 |
| hsa_circRNA_103870 | 2.449179 | 8.161759 | 4.984276 | 0.000844 | 0.01222  | -0.72479 |
| hsa_circRNA_100015 | 2.465624 | 8.663063 | 3.547974 | 0.006617 | 0.035679 | -2.88771 |
| hsa_circRNA_103045 | 2.469936 | 8.051282 | 4.229251 | 0.002402 | 0.019877 | -1.82817 |
| hsa_circRNA_000274 | 2.470078 | 11.47182 | 3.10225  | 0.013254 | 0.054    | -3.60455 |
| hsa_circRNA_001846 | 2.480501 | 10.54641 | 2.525534 | 0.033386 | 0.09234  | -4.53872 |
| hsa_circRNA_100012 | 2.510892 | 9.078743 | 3.781007 | 0.004646 | 0.028797 | -2.51938 |
| hsa_circRNA_002178 | 2.519702 | 11.99667 | 2.856198 | 0.01961  | 0.067492 | -4.00387 |
| hsa_circRNA_100517 | 2.537771 | 7.858853 | 7.087848 | 6.93E-05 | 0.003535 | 1.924587 |
| hsa_circRNA_103407 | 2.550007 | 8.119292 | 4.29058  | 0.0022   | 0.01916  | -1.73559 |
| hsa_circRNA_000585 | 2.572173 | 11.53672 | 2.785044 | 0.021979 | 0.071588 | -4.11934 |
| hsa_circRNA_101835 | 2.605704 | 9.300626 | 3.071004 | 0.013926 | 0.055496 | -3.65519 |
| hsa_circRNA_103108 | 2.627798 | 8.324777 | 3.531554 | 0.006786 | 0.036166 | -2.91386 |
| hsa_circRNA_105028 | 2.737336 | 7.793983 | 3.553986 | 0.006556 | 0.035565 | -2.87814 |
| hsa_circRNA_000166 | 2.761218 | 12.56512 | 2.529461 | 0.033175 | 0.091921 | -4.53241 |
| hsa_circRNA_102712 | 2.815735 | 8.131966 | 5.28043  | 0.000573 | 0.010011 | -0.31434 |
| hsa_circRNA_103871 | 2.832531 | 8.217798 | 4.321112 | 0.002106 | 0.018676 | -1.68968 |
| hsa_circRNA_104645 | 2.83647  | 9.689801 | 3.558174 | 0.006514 | 0.035541 | -2.87147 |
| hsa_circRNA_002144 | 2.837792 | 12.38236 | 2.657171 | 0.026999 | 0.081536 | -4.32647 |
| hsa_circRNA_100631 | 2.838253 | 8.205656 | 3.732652 | 0.004996 | 0.030238 | -2.59535 |
| hsa_circRNA_100414 | 2.894534 | 7.857998 | 3.644471 | 0.005711 | 0.032976 | -2.73453 |
| hsa_circRNA_101836 | 2.982769 | 9.317172 | 3.424075 | 0.008008 | 0.040171 | -3.08559 |
| hsa_circRNA_104634 | 2.993671 | 8.127091 | 10.33071 | 3.64E-06 | 0.000629 | 5.006874 |
| hsa_circRNA_101903 | 2.998643 | 9.407808 | 3.692056 | 0.005313 | 0.031467 | -2.65932 |
| hsa_circRNA_104671 | 3.002265 | 9.637184 | 4.15245  | 0.002684 | 0.021293 | -1.94482 |
| hsa_circRNA_100632 | 3.038505 | 8.219504 | 3.75151  | 0.004856 | 0.029679 | -2.56569 |
| hsa_circRNA_100679 | 3.069502 | 10.15601 | 5.144165 | 0.000684 | 0.010807 | -0.50161 |
| hsa_circRNA_103499 | 3.08827  | 8.445489 | 6.500391 | 0.000132 | 0.004555 | 1.244849 |
| hsa_circRNA_104435 | 3.089381 | 8.961581 | 3.693905 | 0.005298 | 0.031433 | -2.65641 |
| hsa_circRNA_100097 | 3.117204 | 8.479481 | 4.893515 | 0.000953 | 0.012835 | -0.85312 |
| hsa_circRNA_103017 | 3.162877 | 9.652526 | 3.526786 | 0.006836 | 0.036356 | -2.92145 |
| hsa_circRNA_002111 | 3.165186 | 8.779666 | 6.037511 | 0.000225 | 0.005869 | 0.67758  |
| hsa_circRNA_001379 | 3.189428 | 10.70057 | 4.873431 | 0.000979 | 0.012925 | -0.88168 |
| hsa_circRNA_104766 | 3.350103 | 10.02848 | 4.155147 | 0.002673 | 0.021259 | -1.94071 |
| hsa_circRNA_100199 | 3.378275 | 7.777817 | 3.544367 | 0.006654 | 0.035793 | -2.89345 |
| hsa_circRNA_001678 | 3.495568 | 10.57042 | 3.9136   | 0.003811 | 0.025687 | -2.31239 |
| hsa_circRNA_000167 | 3.502511 | 11.04242 | 3.356581 | 0.008893 | 0.043385 | -3.19391 |
| hsa_circRNA_104056 | 3.54755  | 8.575609 | 5.707628 | 0.000335 | 0.00757  | 0.255373 |
| hsa_circRNA_104547 | 4.237441 | 9.770693 | 5.242095 | 0.000602 | 0.010322 | -0.36675 |

**Table S2.** The target genes of the 3 miRNAs predicted by miRTarBase, ENCORI, and TargetScan databases.

| miRNAName   | geneName |
|-------------|----------|
| hsa-miR-326 | KLHL21   |
| hsa-miR-326 | DFFA     |
| hsa-miR-326 | SDC3     |
| hsa-miR-326 | H6PD     |
| hsa-miR-326 | CEP85    |
| hsa-miR-326 | ATP8B2   |
| hsa-miR-326 | TOMM40L  |
| hsa-miR-326 | RALGPS2  |
| hsa-miR-326 | FRA10AC1 |
| hsa-miR-326 | KCNIP2   |
| hsa-miR-326 | SH3PXD2A |
| hsa-miR-326 | ZMIZ1    |
| hsa-miR-326 | ZFYVE27  |
| hsa-miR-326 | HIF1AN   |

---

|                |           |
|----------------|-----------|
| hsa-miR-326    | PARVA     |
| hsa-miR-326    | KRT80     |
| hsa-miR-326    | ITGA5     |
| hsa-miR-326    | ANKRD52   |
| hsa-miR-326    | FBXO21    |
| hsa-miR-326    | ERC1      |
| hsa-miR-326    | HNRNPA1   |
| hsa-miR-326    | RAB21     |
| hsa-miR-326    | SH2B3     |
| hsa-miR-326    | SETD1B    |
| hsa-miR-326    | FNDC3A    |
| hsa-miR-326    | RAP2A     |
| hsa-miR-326    | BCL2L2    |
| hsa-miR-326    | RCOR1     |
| hsa-miR-326    | CSNK1G1   |
| hsa-miR-326    | C16orf87  |
| hsa-miR-326    | WDR59     |
| hsa-miR-326    | ZCCHC14   |
| hsa-miR-326    | GLIS2     |
| hsa-miR-326    | PDK2      |
| hsa-miR-326    | TXNL1     |
| hsa-miR-326    | PTBP1     |
| hsa-miR-326    | FAM126B   |
| hsa-miR-326    | WDFY1     |
| hsa-miR-326    | STK25     |
| hsa-miR-326    | SPATS2L   |
| hsa-miR-326    | CSNK2A1   |
| hsa-miR-326    | BTBD3     |
| hsa-miR-326    | EPB41L1   |
| hsa-miR-326    | SYS1      |
| hsa-miR-326    | RBFOX2    |
| hsa-miR-326    | CBX6      |
| hsa-miR-326    | CSRNP1    |
| hsa-miR-326    | PRICKLE2  |
| hsa-miR-326    | BHLHE40   |
| hsa-miR-326    | PCNP      |
| hsa-miR-326    | MRFAP1    |
| hsa-miR-326    | C5orf22   |
| hsa-miR-326    | HNRNPA2B1 |
| hsa-miR-326    | FSCN1     |
| hsa-miR-326    | EGR3      |
| hsa-miR-326    | CLU       |
| hsa-miR-326    | FGFR1     |
| hsa-miR-326    | PLEC      |
| hsa-miR-326    | TNC       |
| hsa-miR-326    | SLC27A4   |
| hsa-miR-326    | ELK1      |
| hsa-miR-326    | PRAF2     |
| hsa-miR-326    | NONO      |
| hsa-miR-339-3p | MTHFR     |
| hsa-miR-339-3p | MCL1      |
| hsa-miR-339-3p | AKIRIN1   |
| hsa-miR-339-3p | PTGFRN    |
| hsa-miR-339-3p | ARV1      |
| hsa-miR-339-3p | SLC29A3   |
| hsa-miR-339-3p | SCD       |
| hsa-miR-339-3p | SLC25A22  |
| hsa-miR-339-3p | IGF2      |

---



---

|                |          |
|----------------|----------|
| hsa-miR-339-3p | PHLDA2   |
| hsa-miR-339-3p | NAP1L4   |
| hsa-miR-339-3p | ARFGAP2  |
| hsa-miR-339-3p | PTDSS2   |
| hsa-miR-339-3p | SIK2     |
| hsa-miR-339-3p | IFFO1    |
| hsa-miR-339-3p | APPL2    |
| hsa-miR-339-3p | DRAM1    |
| hsa-miR-339-3p | TRAFD1   |
| hsa-miR-339-3p | C2CD4B   |
| hsa-miR-339-3p | HEXA     |
| hsa-miR-339-3p | GLYR1    |
| hsa-miR-339-3p | MGRN1    |
| hsa-miR-339-3p | SLC43A2  |
| hsa-miR-339-3p | PLEKHM1  |
| hsa-miR-339-3p | COL1A1   |
| hsa-miR-339-3p | LGALS3BP |
| hsa-miR-339-3p | CYB5A    |
| hsa-miR-339-3p | PTBP1    |
| hsa-miR-339-3p | RPL28    |
| hsa-miR-339-3p | HDLBP    |
| hsa-miR-339-3p | RRBP1    |
| hsa-miR-339-3p | ID1      |
| hsa-miR-339-3p | ARFGAP1  |
| hsa-miR-339-3p | TMEM184B |
| hsa-miR-339-3p | ITGB5    |
| hsa-miR-339-3p | EDEM1    |
| hsa-miR-339-3p | HTT      |
| hsa-miR-339-3p | NR3C1    |
| hsa-miR-339-3p | PIK3R1   |
| hsa-miR-339-3p | TAPBP    |
| hsa-miR-339-3p | SNX9     |
| hsa-miR-339-3p | TRRAP    |
| hsa-miR-339-3p | HBP1     |
| hsa-miR-339-3p | LOXL2    |
| hsa-miR-339-3p | ST3GAL1  |
| hsa-miR-339-3p | LRRC14   |
| hsa-miR-339-3p | BRD3     |
| hsa-miR-339-3p | NTRK2    |
| hsa-miR-339-3p | S1PR3    |
| hsa-miR-339-3p | ZBTB43   |
| hsa-miR-339-3p | URM1     |
| hsa-miR-339-3p | KLHL15   |
| hsa-miR-339-3p | RP2      |
| hsa-miR-671-5p | DNAJC11  |
| hsa-miR-671-5p | CTNNBIP1 |
| hsa-miR-671-5p | MTHFR    |
| hsa-miR-671-5p | RCC2     |
| hsa-miR-671-5p | UBR4     |
| hsa-miR-671-5p | WASF2    |
| hsa-miR-671-5p | PSMB2    |
| hsa-miR-671-5p | MEAF6    |
| hsa-miR-671-5p | SF3A3    |
| hsa-miR-671-5p | SCMH1    |
| hsa-miR-671-5p | FOXJ3    |
| hsa-miR-671-5p | CC2D1B   |
| hsa-miR-671-5p | DHCR24   |
| hsa-miR-671-5p | SLC35D1  |

---



---

|                |          |
|----------------|----------|
| hsa-miR-671-5p | CTBS     |
| hsa-miR-671-5p | EVI5     |
| hsa-miR-671-5p | DBT      |
| hsa-miR-671-5p | GDAP2    |
| hsa-miR-671-5p | PI4KB    |
| hsa-miR-671-5p | SMG5     |
| hsa-miR-671-5p | HDGF     |
| hsa-miR-671-5p | STX6     |
| hsa-miR-671-5p | GLUL     |
| hsa-miR-671-5p | EDEM3    |
| hsa-miR-671-5p | RBBP5    |
| hsa-miR-671-5p | LPGAT1   |
| hsa-miR-671-5p | C1orf35  |
| hsa-miR-671-5p | PHF13    |
| hsa-miR-671-5p | VAMP3    |
| hsa-miR-671-5p | PGD      |
| hsa-miR-671-5p | FBXO44   |
| hsa-miR-671-5p | PLOD1    |
| hsa-miR-671-5p | ZBTB40   |
| hsa-miR-671-5p | SESN2    |
| hsa-miR-671-5p | EPB41    |
| hsa-miR-671-5p | HDAC1    |
| hsa-miR-671-5p | AGO4     |
| hsa-miR-671-5p | ADPRHL2  |
| hsa-miR-671-5p | RIMKLA   |
| hsa-miR-671-5p | CMPK1    |
| hsa-miR-671-5p | NFIA     |
| hsa-miR-671-5p | AK4      |
| hsa-miR-671-5p | FNBP1L   |
| hsa-miR-671-5p | SLC30A7  |
| hsa-miR-671-5p | AMPD2    |
| hsa-miR-671-5p | LRIG2    |
| hsa-miR-671-5p | VPS45    |
| hsa-miR-671-5p | TOMM40L  |
| hsa-miR-671-5p | C1orf226 |
| hsa-miR-671-5p | POGK     |
| hsa-miR-671-5p | MPZL1    |
| hsa-miR-671-5p | PRDX6    |
| hsa-miR-671-5p | XPR1     |
| hsa-miR-671-5p | PPP1R12B |
| hsa-miR-671-5p | TMEM183A |
| hsa-miR-671-5p | BTG2     |
| hsa-miR-671-5p | MDM4     |
| hsa-miR-671-5p | CAPN2    |
| hsa-miR-671-5p | MTR      |
| hsa-miR-671-5p | LARP4B   |
| hsa-miR-671-5p | RSU1     |
| hsa-miR-671-5p | CCDC6    |
| hsa-miR-671-5p | PSAP     |
| hsa-miR-671-5p | AP3M1    |
| hsa-miR-671-5p | ZCCHC24  |
| hsa-miR-671-5p | MGEA5    |
| hsa-miR-671-5p | SH3PXD2A |
| hsa-miR-671-5p | RAB18    |
| hsa-miR-671-5p | VPS26A   |
| hsa-miR-671-5p | EIF4EBP2 |
| hsa-miR-671-5p | SGPL1    |
| hsa-miR-671-5p | CHST3    |

---

---

|                |          |
|----------------|----------|
| hsa-miR-671-5p | DDIT4    |
| hsa-miR-671-5p | SEC24C   |
| hsa-miR-671-5p | PI4K2A   |
| hsa-miR-671-5p | SCD      |
| hsa-miR-671-5p | SFXN3    |
| hsa-miR-671-5p | PLEKHA1  |
| hsa-miR-671-5p | INPP5A   |
| hsa-miR-671-5p | TPP1     |
| hsa-miR-671-5p | TRIM66   |
| hsa-miR-671-5p | SBF2     |
| hsa-miR-671-5p | LIN7C    |
| hsa-miR-671-5p | CELF1    |
| hsa-miR-671-5p | OSBP     |
| hsa-miR-671-5p | FADS1    |
| hsa-miR-671-5p | SF1      |
| hsa-miR-671-5p | EHD1     |
| hsa-miR-671-5p | CD248    |
| hsa-miR-671-5p | SPTBN2   |
| hsa-miR-671-5p | CDK2AP2  |
| hsa-miR-671-5p | C11orf24 |
| hsa-miR-671-5p | SHANK2   |
| hsa-miR-671-5p | PICALM   |
| hsa-miR-671-5p | MPZL3    |
| hsa-miR-671-5p | HYOU1    |
| hsa-miR-671-5p | THY1     |
| hsa-miR-671-5p | AP2A2    |
| hsa-miR-671-5p | NAV2     |
| hsa-miR-671-5p | CRY2     |
| hsa-miR-671-5p | RTN3     |
| hsa-miR-671-5p | GPR137   |
| hsa-miR-671-5p | ESRRA    |
| hsa-miR-671-5p | PPME1    |
| hsa-miR-671-5p | PANX1    |
| hsa-miR-671-5p | FOXRED1  |
| hsa-miR-671-5p | APLP2    |
| hsa-miR-671-5p | FOXM1    |
| hsa-miR-671-5p | M6PR     |
| hsa-miR-671-5p | LRP6     |
| hsa-miR-671-5p | WBP11    |
| hsa-miR-671-5p | KRAS     |
| hsa-miR-671-5p | SLC38A2  |
| hsa-miR-671-5p | NCKAP5L  |
| hsa-miR-671-5p | CBX5     |
| hsa-miR-671-5p | SMARCC2  |
| hsa-miR-671-5p | ANKRD52  |
| hsa-miR-671-5p | PAN2     |
| hsa-miR-671-5p | BAZ2A    |
| hsa-miR-671-5p | R3HDM2   |
| hsa-miR-671-5p | CORO1C   |
| hsa-miR-671-5p | KSR2     |
| hsa-miR-671-5p | CAMKK2   |
| hsa-miR-671-5p | SBNO1    |
| hsa-miR-671-5p | SCARB1   |
| hsa-miR-671-5p | CHFR     |
| hsa-miR-671-5p | CREBL2   |
| hsa-miR-671-5p | DDX11    |
| hsa-miR-671-5p | TMBIM6   |
| hsa-miR-671-5p | PFDN5    |

---

---

|                |          |
|----------------|----------|
| hsa-miR-671-5p | PA2G4    |
| hsa-miR-671-5p | IRAK3    |
| hsa-miR-671-5p | OAS2     |
| hsa-miR-671-5p | SUDS3    |
| hsa-miR-671-5p | HSPB8    |
| hsa-miR-671-5p | UNC119B  |
| hsa-miR-671-5p | DENR     |
| hsa-miR-671-5p | ARL6IP4  |
| hsa-miR-671-5p | EP400    |
| hsa-miR-671-5p | SACS     |
| hsa-miR-671-5p | MTMR6    |
| hsa-miR-671-5p | SLC7A1   |
| hsa-miR-671-5p | SGCG     |
| hsa-miR-671-5p | IPO5     |
| hsa-miR-671-5p | CFL2     |
| hsa-miR-671-5p | TMED10   |
| hsa-miR-671-5p | ANGEL1   |
| hsa-miR-671-5p | SEL1L    |
| hsa-miR-671-5p | BAG5     |
| hsa-miR-671-5p | TOX4     |
| hsa-miR-671-5p | SAMD4A   |
| hsa-miR-671-5p | OTUB2    |
| hsa-miR-671-5p | GSKIP    |
| hsa-miR-671-5p | CRIP2    |
| hsa-miR-671-5p | BMF      |
| hsa-miR-671-5p | MFAP1    |
| hsa-miR-671-5p | ANXA2    |
| hsa-miR-671-5p | RORA     |
| hsa-miR-671-5p | IGDCC4   |
| hsa-miR-671-5p | HEXA     |
| hsa-miR-671-5p | EDC3     |
| hsa-miR-671-5p | PRC1     |
| hsa-miR-671-5p | THBS1    |
| hsa-miR-671-5p | SMAD3    |
| hsa-miR-671-5p | CD276    |
| hsa-miR-671-5p | AEN      |
| hsa-miR-671-5p | ABHD2    |
| hsa-miR-671-5p | ZNF710   |
| hsa-miR-671-5p | CRTC3    |
| hsa-miR-671-5p | NARFL    |
| hsa-miR-671-5p | LITAF    |
| hsa-miR-671-5p | ARL6IP1  |
| hsa-miR-671-5p | TUFM     |
| hsa-miR-671-5p | ZNF764   |
| hsa-miR-671-5p | NUDT21   |
| hsa-miR-671-5p | DYNC1LI2 |
| hsa-miR-671-5p | AP1G1    |
| hsa-miR-671-5p | ZDHHC7   |
| hsa-miR-671-5p | SLC7A5   |
| hsa-miR-671-5p | CHMP1A   |
| hsa-miR-671-5p | PDPK1    |
| hsa-miR-671-5p | KCTD5    |
| hsa-miR-671-5p | PAQR4    |
| hsa-miR-671-5p | PMM2     |
| hsa-miR-671-5p | C16orf72 |
| hsa-miR-671-5p | SNN      |
| hsa-miR-671-5p | MKL2     |
| hsa-miR-671-5p | ITPRIPL2 |

---

---

|                |          |
|----------------|----------|
| hsa-miR-671-5p | MMP2     |
| hsa-miR-671-5p | CPNE2    |
| hsa-miR-671-5p | PDPR     |
| hsa-miR-671-5p | SF3B3    |
| hsa-miR-671-5p | CRISPLD2 |
| hsa-miR-671-5p | ABR      |
| hsa-miR-671-5p | PITPNA   |
| hsa-miR-671-5p | TRPV1    |
| hsa-miR-671-5p | ANKFY1   |
| hsa-miR-671-5p | DHX33    |
| hsa-miR-671-5p | ZBTB4    |
| hsa-miR-671-5p | KIAA0100 |
| hsa-miR-671-5p | LRRC59   |
| hsa-miR-671-5p | VEZF1    |
| hsa-miR-671-5p | DDX5     |
| hsa-miR-671-5p | GGA3     |
| hsa-miR-671-5p | WBP2     |
| hsa-miR-671-5p | USP36    |
| hsa-miR-671-5p | TIMP2    |
| hsa-miR-671-5p | LGALS3BP |
| hsa-miR-671-5p | CBX4     |
| hsa-miR-671-5p | NPLOC4   |
| hsa-miR-671-5p | MAFG     |
| hsa-miR-671-5p | C17orf62 |
| hsa-miR-671-5p | MINK1    |
| hsa-miR-671-5p | MED9     |
| hsa-miR-671-5p | ALDH3A2  |
| hsa-miR-671-5p | AP2B1    |
| hsa-miR-671-5p | CDK12    |
| hsa-miR-671-5p | RAPGEFL1 |
| hsa-miR-671-5p | IGFBP4   |
| hsa-miR-671-5p | ATP6V0A1 |
| hsa-miR-671-5p | UBE2Z    |
| hsa-miR-671-5p | RSAD1    |
| hsa-miR-671-5p | MAP3K3   |
| hsa-miR-671-5p | METRNL   |
| hsa-miR-671-5p | SMAD2    |
| hsa-miR-671-5p | RAB31    |
| hsa-miR-671-5p | ZCCHC2   |
| hsa-miR-671-5p | POLR2E   |
| hsa-miR-671-5p | MKNK2    |
| hsa-miR-671-5p | AES      |
| hsa-miR-671-5p | NR2F6    |
| hsa-miR-671-5p | ZNF100   |
| hsa-miR-671-5p | ANKRD27  |
| hsa-miR-671-5p | ZNF585B  |
| hsa-miR-671-5p | AKT2     |
| hsa-miR-671-5p | SERTAD1  |
| hsa-miR-671-5p | RDH13    |
| hsa-miR-671-5p | PTBP1    |
| hsa-miR-671-5p | CCDC94   |
| hsa-miR-671-5p | ZNF627   |
| hsa-miR-671-5p | NACC1    |
| hsa-miR-671-5p | PGPEP1   |
| hsa-miR-671-5p | MAU2     |
| hsa-miR-671-5p | HNRNPUL1 |
| hsa-miR-671-5p | ZNF225   |
| hsa-miR-671-5p | GRWD1    |

---

---

|                |           |
|----------------|-----------|
| hsa-miR-671-5p | PXDN      |
| hsa-miR-671-5p | DNMT3A    |
| hsa-miR-671-5p | MCFD2     |
| hsa-miR-671-5p | RTN4      |
| hsa-miR-671-5p | SERTAD2   |
| hsa-miR-671-5p | AAK1      |
| hsa-miR-671-5p | TEX261    |
| hsa-miR-671-5p | TGOLN2    |
| hsa-miR-671-5p | RETSAT    |
| hsa-miR-671-5p | CHST10    |
| hsa-miR-671-5p | CCDC93    |
| hsa-miR-671-5p | POLR2D    |
| hsa-miR-671-5p | HS6ST1    |
| hsa-miR-671-5p | FAM168B   |
| hsa-miR-671-5p | MCM6      |
| hsa-miR-671-5p | SATB2     |
| hsa-miR-671-5p | LANCL1    |
| hsa-miR-671-5p | IGFBP5    |
| hsa-miR-671-5p | SERPINE2  |
| hsa-miR-671-5p | NDUFA10   |
| hsa-miR-671-5p | HDLBP     |
| hsa-miR-671-5p | RNF144A   |
| hsa-miR-671-5p | DDX1      |
| hsa-miR-671-5p | DPYSL5    |
| hsa-miR-671-5p | MAPRE3    |
| hsa-miR-671-5p | SLC30A6   |
| hsa-miR-671-5p | ACTR2     |
| hsa-miR-671-5p | TET3      |
| hsa-miR-671-5p | CNNM3     |
| hsa-miR-671-5p | EIF5B     |
| hsa-miR-671-5p | MAP4K4    |
| hsa-miR-671-5p | IL1R1     |
| hsa-miR-671-5p | TSN       |
| hsa-miR-671-5p | GPD2      |
| hsa-miR-671-5p | DCAF17    |
| hsa-miR-671-5p | CYBRD1    |
| hsa-miR-671-5p | STK16     |
| hsa-miR-671-5p | CAB39     |
| hsa-miR-671-5p | ING5      |
| hsa-miR-671-5p | C20orf194 |
| hsa-miR-671-5p | ZNF337    |
| hsa-miR-671-5p | PLAGL2    |
| hsa-miR-671-5p | TGM2      |
| hsa-miR-671-5p | PREX1     |
| hsa-miR-671-5p | STAU1     |
| hsa-miR-671-5p | SPATA2    |
| hsa-miR-671-5p | PSMF1     |
| hsa-miR-671-5p | MAVS      |
| hsa-miR-671-5p | BTBD3     |
| hsa-miR-671-5p | DSTN      |
| hsa-miR-671-5p | CBFA2T2   |
| hsa-miR-671-5p | DLGAP4    |
| hsa-miR-671-5p | RNF114    |
| hsa-miR-671-5p | OSBPL2    |
| hsa-miR-671-5p | ADAMTS1   |
| hsa-miR-671-5p | HMGN1     |
| hsa-miR-671-5p | ICOSLG    |
| hsa-miR-671-5p | PTTG1IP   |

---

---

|                |              |
|----------------|--------------|
| hsa-miR-671-5p | GABPA        |
| hsa-miR-671-5p | PDXK         |
| hsa-miR-671-5p | ATP6V1E1     |
| hsa-miR-671-5p | MICAL3       |
| hsa-miR-671-5p | PIK3IP1      |
| hsa-miR-671-5p | PRR14L       |
| hsa-miR-671-5p | MYH9         |
| hsa-miR-671-5p | TMEM184B     |
| hsa-miR-671-5p | SUN2         |
| hsa-miR-671-5p | CBX6         |
| hsa-miR-671-5p | RPS19BP1     |
| hsa-miR-671-5p | BCL2L13      |
| hsa-miR-671-5p | CRKL         |
| hsa-miR-671-5p | SMARCB1      |
| hsa-miR-671-5p | SPECC1L      |
| hsa-miR-671-5p | NF2          |
| hsa-miR-671-5p | HMOX1        |
| hsa-miR-671-5p | CCDC134      |
| hsa-miR-671-5p | NUP50        |
| hsa-miR-671-5p | ZBED4        |
| hsa-miR-671-5p | VGLL4        |
| hsa-miR-671-5p | TBC1D5       |
| hsa-miR-671-5p | HIGD1A       |
| hsa-miR-671-5p | ZNF445       |
| hsa-miR-671-5p | ZDHHHC3      |
| hsa-miR-671-5p | SHISA5       |
| hsa-miR-671-5p | TUSC2        |
| hsa-miR-671-5p | WDR82        |
| hsa-miR-671-5p | SUCLG2       |
| hsa-miR-671-5p | FOXP1        |
| hsa-miR-671-5p | DCBLD2       |
| hsa-miR-671-5p | CBLB         |
| hsa-miR-671-5p | CD47         |
| hsa-miR-671-5p | FSTL1        |
| hsa-miR-671-5p | PFN2         |
| hsa-miR-671-5p | SIAH2        |
| hsa-miR-671-5p | VEPH1        |
| hsa-miR-671-5p | KPNA4        |
| hsa-miR-671-5p | PLD1         |
| hsa-miR-671-5p | NCBP2        |
| hsa-miR-671-5p | NR2C2        |
| hsa-miR-671-5p | STAC         |
| hsa-miR-671-5p | SACM1L       |
| hsa-miR-671-5p | NDUFAF3      |
| hsa-miR-671-5p | MAPKAPK3     |
| hsa-miR-671-5p | ABHD14A-ACY1 |
| hsa-miR-671-5p | ACY1         |
| hsa-miR-671-5p | C3orf38      |
| hsa-miR-671-5p | ABHD10       |
| hsa-miR-671-5p | UMPS         |
| hsa-miR-671-5p | SEC61A1      |
| hsa-miR-671-5p | ATP1B3       |
| hsa-miR-671-5p | PRKCI        |
| hsa-miR-671-5p | NDUFB5       |
| hsa-miR-671-5p | DVL3         |
| hsa-miR-671-5p | TMEM129      |
| hsa-miR-671-5p | MXD4         |
| hsa-miR-671-5p | LRPAP1       |

---

---

|                |          |
|----------------|----------|
| hsa-miR-671-5p | PPARGC1A |
| hsa-miR-671-5p | PPAT     |
| hsa-miR-671-5p | ANKRD17  |
| hsa-miR-671-5p | PPP3CA   |
| hsa-miR-671-5p | SETD7    |
| hsa-miR-671-5p | MAML3    |
| hsa-miR-671-5p | FBXW7    |
| hsa-miR-671-5p | FAT1     |
| hsa-miR-671-5p | ADD1     |
| hsa-miR-671-5p | HTT      |
| hsa-miR-671-5p | MAN2B2   |
| hsa-miR-671-5p | NCAPG    |
| hsa-miR-671-5p | KIT      |
| hsa-miR-671-5p | THAP6    |
| hsa-miR-671-5p | TRIM2    |
| hsa-miR-671-5p | RAPGEF2  |
| hsa-miR-671-5p | LPCAT1   |
| hsa-miR-671-5p | RICTOR   |
| hsa-miR-671-5p | WDR41    |
| hsa-miR-671-5p | SERINC5  |
| hsa-miR-671-5p | REEP5    |
| hsa-miR-671-5p | VDAC1    |
| hsa-miR-671-5p | GNPDA1   |
| hsa-miR-671-5p | SH3TC2   |
| hsa-miR-671-5p | PDGFRB   |
| hsa-miR-671-5p | SPARC    |
| hsa-miR-671-5p | ATOX1    |
| hsa-miR-671-5p | MGAT1    |
| hsa-miR-671-5p | MTRR     |
| hsa-miR-671-5p | WDR36    |
| hsa-miR-671-5p | SNX24    |
| hsa-miR-671-5p | SLC36A1  |
| hsa-miR-671-5p | GALNT10  |
| hsa-miR-671-5p | CNOT8    |
| hsa-miR-671-5p | CYFIP2   |
| hsa-miR-671-5p | HRH2     |
| hsa-miR-671-5p | CANX     |
| hsa-miR-671-5p | SQSTM1   |
| hsa-miR-671-5p | SSR1     |
| hsa-miR-671-5p | TRIM27   |
| hsa-miR-671-5p | DDX39B   |
| hsa-miR-671-5p | HLA-DRB5 |
| hsa-miR-671-5p | HLA-DRB1 |
| hsa-miR-671-5p | C6orf106 |
| hsa-miR-671-5p | STK38    |
| hsa-miR-671-5p | MRPS10   |
| hsa-miR-671-5p | MRPS18A  |
| hsa-miR-671-5p | RPS6KA2  |
| hsa-miR-671-5p | E2F3     |
| hsa-miR-671-5p | ZNF391   |
| hsa-miR-671-5p | ITPR3    |
| hsa-miR-671-5p | HMGA1    |
| hsa-miR-671-5p | PPARD    |
| hsa-miR-671-5p | C6orf89  |
| hsa-miR-671-5p | PIM1     |
| hsa-miR-671-5p | TAF8     |
| hsa-miR-671-5p | PTP4A1   |
| hsa-miR-671-5p | FOXO3    |

---



---

|                |          |
|----------------|----------|
| hsa-miR-671-5p | RAB32    |
| hsa-miR-671-5p | HIP1     |
| hsa-miR-671-5p | CDK6     |
| hsa-miR-671-5p | PDAP1    |
| hsa-miR-671-5p | TMEM209  |
| hsa-miR-671-5p | PODXL    |
| hsa-miR-671-5p | MAFK     |
| hsa-miR-671-5p | TTYH3    |
| hsa-miR-671-5p | WIP1     |
| hsa-miR-671-5p | BZW2     |
| hsa-miR-671-5p | EGFR     |
| hsa-miR-671-5p | PEG10    |
| hsa-miR-671-5p | BCAP29   |
| hsa-miR-671-5p | FOXP2    |
| hsa-miR-671-5p | DLC1     |
| hsa-miR-671-5p | PNMA2    |
| hsa-miR-671-5p | MMP16    |
| hsa-miR-671-5p | ANKRD46  |
| hsa-miR-671-5p | YWHAZ    |
| hsa-miR-671-5p | KLF10    |
| hsa-miR-671-5p | TRPS1    |
| hsa-miR-671-5p | SAMD12   |
| hsa-miR-671-5p | C8orf82  |
| hsa-miR-671-5p | FBXO25   |
| hsa-miR-671-5p | ERI1     |
| hsa-miR-671-5p | POLR3D   |
| hsa-miR-671-5p | C8orf58  |
| hsa-miR-671-5p | EXTL3    |
| hsa-miR-671-5p | TACC1    |
| hsa-miR-671-5p | HGSNAT   |
| hsa-miR-671-5p | ATP6V1C1 |
| hsa-miR-671-5p | WISP1    |
| hsa-miR-671-5p | GOLM1    |
| hsa-miR-671-5p | LPAR1    |
| hsa-miR-671-5p | POLE3    |
| hsa-miR-671-5p | AK1      |
| hsa-miR-671-5p | C9orf78  |
| hsa-miR-671-5p | SEC16A   |
| hsa-miR-671-5p | NOTCH1   |
| hsa-miR-671-5p | RCL1     |
| hsa-miR-671-5p | CD274    |
| hsa-miR-671-5p | GLIPR2   |
| hsa-miR-671-5p | NR4A3    |
| hsa-miR-671-5p | TOR1B    |
| hsa-miR-671-5p | GPR107   |
| hsa-miR-671-5p | TRAPPC2  |
| hsa-miR-671-5p | CXorf38  |
| hsa-miR-671-5p | ELK1     |
| hsa-miR-671-5p | SMC1A    |
| hsa-miR-671-5p | KLHL13   |
| hsa-miR-671-5p | CUL4B    |
| hsa-miR-671-5p | BCAP31   |
| hsa-miR-671-5p | FLNA     |
| hsa-miR-671-5p | UBL4A    |
| hsa-miR-671-5p | MPP1     |
| hsa-miR-671-5p | PRRG1    |
| hsa-miR-671-5p | OGT      |
| hsa-miR-671-5p | PRPS1    |

---

---

|                |                  |
|----------------|------------------|
| hsa-miR-671-5p | TMEM164          |
| hsa-miR-671-5p | ZBTB33           |
| hsa-miR-339-3p | hsa_circ_0002805 |
| hsa-miR-326    | hsa_circ_0002805 |
| hsa-miR-671-5p | hsa_circ_0002805 |

---
